# Supplementary material for: Association between Mortality and Sequential Organ Failure Assessment Score during a Short Stay in the Intensive Care Unit after Non-Cardiac Surgery
Source: J Clin Med. 2022 Oct 4;11(19):5865. doi: 10.3390/jcm11195865 (PMC9573186; doi:10.3390/jcm11195865)
Supplement: Supplementary file 1 [file jcm-11-05865-s001.zip › jcm-1913216-supplementary.pdf]

**Table S1.** Effect of an unmeasured confounder on hazard ratio of worsened SOFA score for three-year mortality after IPW adjustment.

|                  |     | OR <sub>ZY X</sub> |                  |                  |                  |                   |                  |
|------------------|-----|--------------------|------------------|------------------|------------------|-------------------|------------------|
|                  |     | 1.5                | 2                | 2.5              | 3                | 3.5               | 4                |
| OR <sub>ZX</sub> | 0.3 | 1.59 (1.40–1.80)   | 1.71 (1.51–1.94) | 1.83 (1.61–2.07) | 1.91 (1.69–2.17) | 2.06 (1.81–2.33)  | 2.09 (1.84–2.37) |
|                  | 0.4 | 1.55 (1.37–1.76)   | 1.64 (1.44–1.85) | 1.73 (1.53–1.96) | 1.81 (1.59–2.05) | 1.88 (1.66–2.13)  | 1.93 (1.71–2.19) |
|                  | 0.5 | 1.51 (1.34–1.71)   | 1.59 (1.40–1.80) | 1.66 (1.46–1.88) | 1.71 (1.51–1.94) | 1.78 (1.58–2.02)  | 1.80 (1.59–2.04) |
|                  | 0.6 | 1.49 (1.32–1.69)   | 1.54 (1.36–1.75) | 1.59 (1.41–1.80) | 1.63 (1.44–1.84) | 1.67 (1.418–1.89) | 1.70 (1.50–1.92) |
|                  | 0.7 | 1.47 (1.30–1.67)   | 1.51 (1.33–1.71) | 1.53 (1.35–1.73) | 1.56 (1.38–1.76) | 1.59 (1.41–1.80)  | 1.62 (1.43–1.84) |

Prevalence of unmeasured confounder = 40%. Numbers represent HRs (including 95% CIs). HR, hazard ratio; X: dichotomous exposure measure, y dichotomous outcome measure, z : potential dichotomous confounder. OR<sub>ZX</sub> indicates the association (OR) between the unmeasured confounder and worsened SOFA score. OR<sub>ZY|X</sub> indicates the association (OR) between the unmeasured confounder and three-year mortality.
